# Supplementary material for: Nanoscale Composite Protective Preparation for Cars Paint and Varnish Coatings
Source: MDPI journal article supplement (doi:10.3390/coatings12091267), 2022-08-30
Supplement: s1 [file s1]

# Nanoscale Composite Protective Preparation for Cars Paint and Varnish Coatings

Andrey Vladimirovich Blinov <sup>1</sup>, Andrey Ashotovich Nagdalian <sup>1,2,\*</sup>, Lyudmila Pavlovna Arefeva <sup>3</sup>, Valery Nikolaevich Varavka <sup>3</sup>, Oleg Vyacheslavovich Kudryakov <sup>3</sup>, Alexey Alekseevich Gvozdenko <sup>1</sup>, Alexey Borisovich Golik <sup>1</sup>, Anastasiya Aleksandrovna Blinova <sup>1</sup>, David Guramievich Maglakelidze <sup>1</sup>, Dionis Demokritovich Filippov <sup>1</sup>, Vyacheslav Anatolievich Lapin <sup>1,4</sup>, Ekaterina Dmitrievna Nazaretova <sup>5</sup> and Mohammad Ali Shariati <sup>6</sup>

<sup>1</sup> Department of Physics and Technology of Nanostructures and Materials, North Caucasus Federal University, 355017 Stavropol, Russia

<sup>2</sup> Saint Petersburg State Agrarian University, 196601 Saint Petersburg, Russia

<sup>3</sup> Don State Technical University, 344000 Rostov-on-Don, Russia

<sup>4</sup> Federal Research Centre the Southern Scientific Centre of the Russian Academy of Sciences, 344006 Rostov-on-Don, Russia

<sup>5</sup> Specialized Educational Research Center, North Caucasus Federal University, 355017 Stavropol, Russia

<sup>6</sup> Department of Scientific Research, K.G. Razumovsky Moscow State University of Technologies and Management (The First Cossack University), 109004 Moscow, Russia

\* Correspondence: geniando@yandex.ru

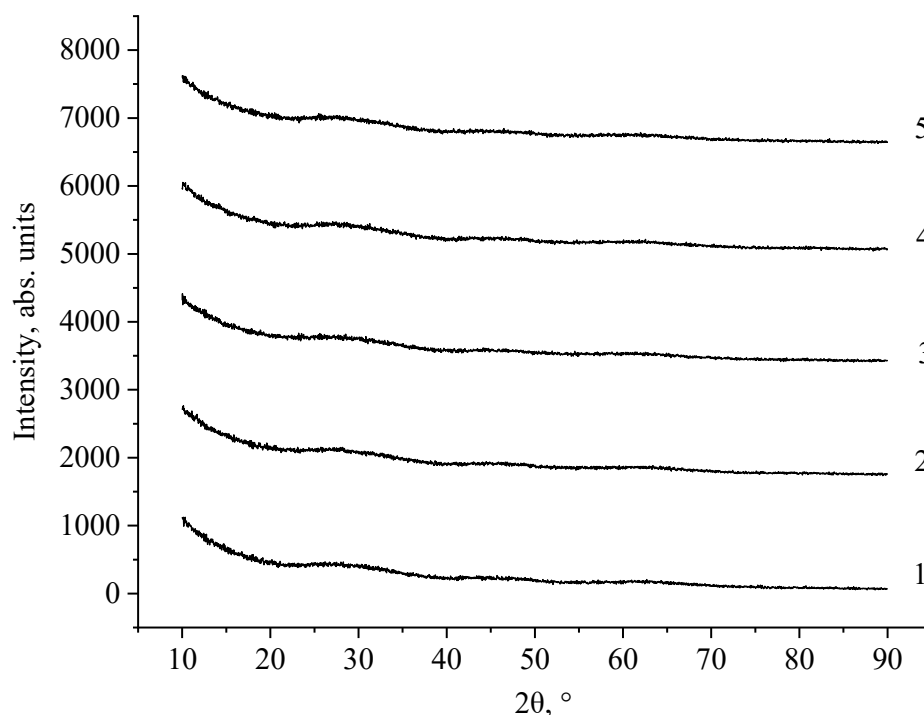

**Figure S1.** Diffractograms of TiO<sub>2</sub>-ZrO<sub>2</sub> nanocomposite samples: 1—0.1% ZrO<sub>2</sub>, 2—0.5% ZrO<sub>2</sub>, 3—1% ZrO<sub>2</sub>, 4—2% ZrO<sub>2</sub>, 5—3% ZrO<sub>2</sub>.

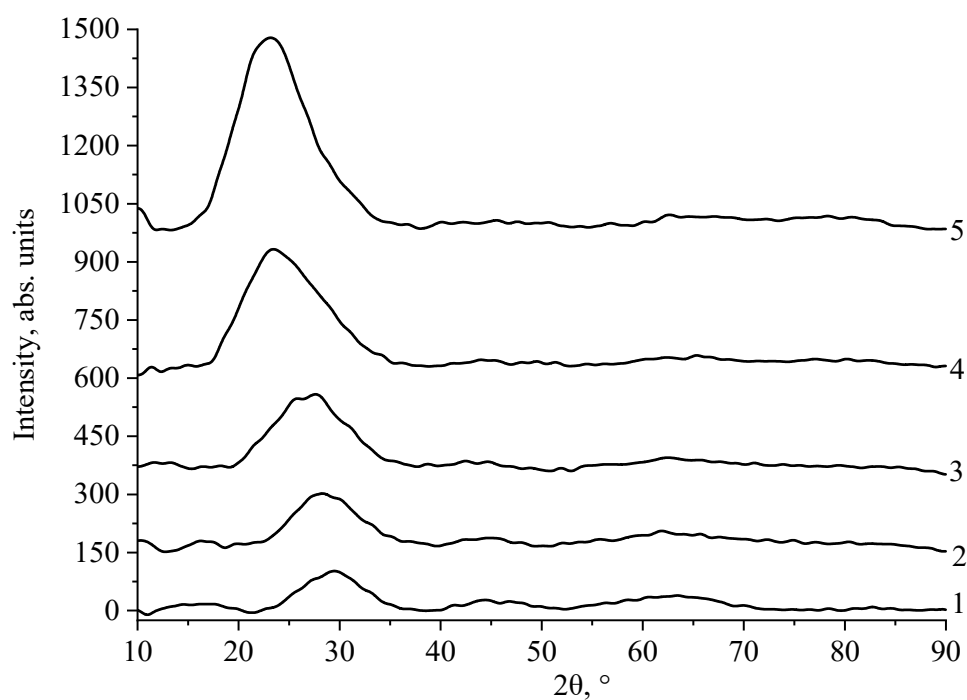

**Figure S2.** Diffractograms of SiO<sub>2</sub>-TiO<sub>2</sub> nanocomposite samples: 1—10% SiO<sub>2</sub> and 90% TiO<sub>2</sub>; 2—30% SiO<sub>2</sub> and 70% TiO<sub>2</sub>; 3—50% SiO<sub>2</sub> and 50% TiO<sub>2</sub>; 4—70% SiO<sub>2</sub> and 30% TiO<sub>2</sub>; 5—90% SiO<sub>2</sub> and 10% TiO<sub>2</sub>.

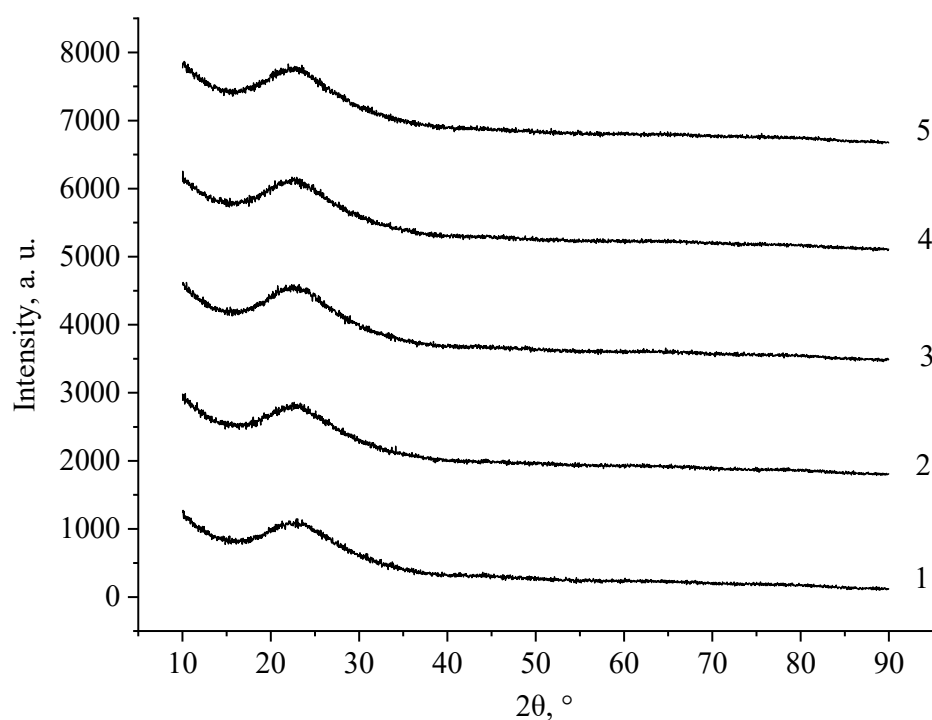

**Figure S3.** Diffractograms of SiO<sub>2</sub>-TiO<sub>2</sub>-ZrO<sub>2</sub> nanocomposite samples: 1—0.1% ZrO<sub>2</sub> and 9.9% TiO<sub>2</sub>; 2—0.5% ZrO<sub>2</sub> and 9.5% TiO<sub>2</sub>; 3—1% ZrO<sub>2</sub> and 9% TiO<sub>2</sub>; 4—2% ZrO<sub>2</sub> and 8% TiO<sub>2</sub>; 5—3% ZrO<sub>2</sub> and 7% TiO<sub>2</sub>.

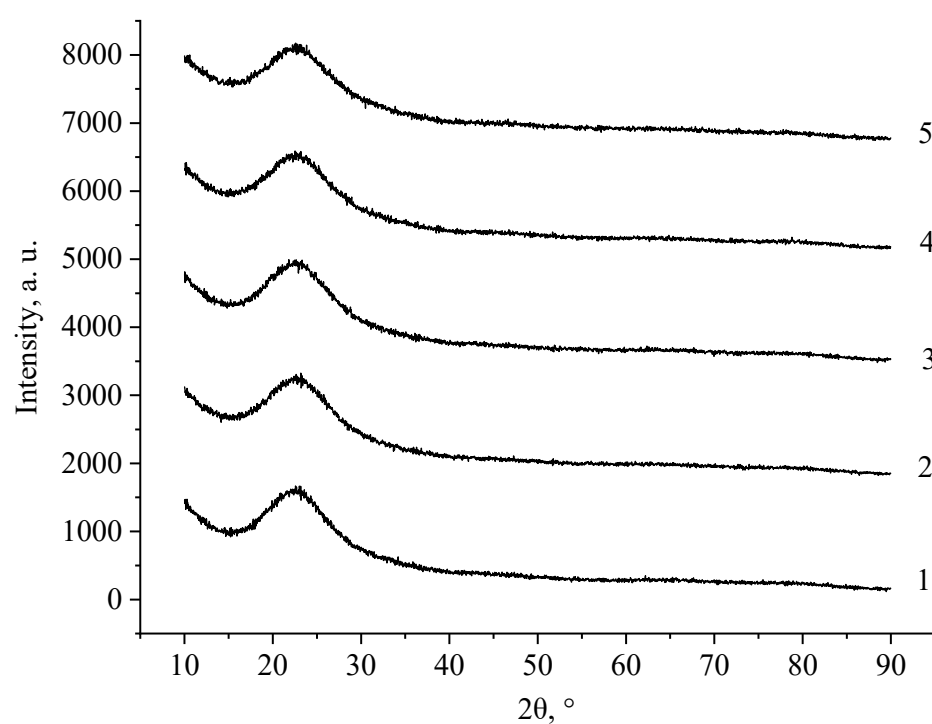

**Figure S4.** Diffractograms of SiO<sub>2</sub>-ZrO<sub>2</sub> nanocomposite samples: 1—0.1% ZrO<sub>2</sub>, 2—0.5% ZrO<sub>2</sub>, 3—1% ZrO<sub>2</sub>, 4—2% ZrO<sub>2</sub>, 5—3% ZrO<sub>2</sub>.
